# Supplementary material for: Ultra-long sequencing for contiguous haplotype resolution of the human immunoglobulin heavy-chain locus
Source: HighWire-hosted journal article supplement (doi:10.1101/gr.280400.125), 2025-08-21
Supplement: Supplemental_Table_S1.xlsx [file Supplemental_Table_S1.xlsx]

## Sheet: Sheet1
Table S1. Quantification of IGH genes and alleles. Summary of genes and alleles annotated in all haplotype assemblies from HD1, HD2, MS1 and MS2.
Region	Number of genes found	Number of discrete alleles found	Number of alleles with no IMGT MATCH	Number of discrete novel alleles	Number of discrete novel alleles found in VDJbase	Number of discrete alleles not in VDJbase
IGHV	362	138	29	24	21	3
IGHD	177	34	1	1	0	1
IGHJ	42	7	1	1	0	1
IGHC	69	40	32	23	0	23
Total	650	219	63	49	21	28
