# Supplementary material for: Ultra-long sequencing for contiguous haplotype resolution of the human immunoglobulin heavy-chain locus
Source: HighWire-hosted journal article supplement (doi:10.1101/gr.280400.125), 2025-08-21
Supplement: Supplemental_Table_S2.xlsx [file Supplemental_Table_S2.xlsx]

## Sheet: Sheet1
Table S2. Ig serum levels in MS2.
Isotype	Serum level (g/L)
IgG	2025-06-13
IgA	2025-06-01
IgM	2025-06-01
